# Adaptation of the Arizona Cognitive Task Battery for use with the Ts65Dn Mouse Model of Down Syndrome

Michael R. Hunsaker<sup>\*</sup>

Department of Psychology, University of Utah, Salt Lake City, UT

Genevieve K. Smith

Department of Psychology, University of Utah, Salt Lake City, UT

Raymond P. Kesner<sup>\*\*</sup>

Department of Psychology, University of Utah, Salt Lake City, UT

## Author Note

<sup>\*</sup>Current address: Special Education Department, Granite School District, 2500 S State Street, Salt Lake City, UT 84115

<sup>\*\*</sup>Please send correspondence and requests for offprint copies to: Raymond P. Kesner, Department of Psychology, University of Utah

The authors wish to acknowledge Dr. Julie Korenberg for providing access to facilities where these experiments were conducted.

All authors declare they have no competing financial or professional interests

# Abstract

We propose and validate a clear strategy to efficiently and comprehensively characterize neurobehavioral deficits in the Ts65Dn mouse model of Down Syndrome. This novel approach uses neurocognitive theory to design and select behavioral tasks that test specific hypotheses concerning Down Syndrome. In this manuscript we model in Ts65Dn mice the Arizona Cognitive Task Battery used to study human populations with Down Syndrome. This approach extends the utility of mouse models of Down Syndrome by integrating the expertise of clinical neurology and cognitive neuroscience into the mouse behavioral laboratory. Further, by directly emphasizing the reciprocal translation of research between human disease states and the associated mouse models, we demonstrate that it is possible for both groups to mutually inform each others' research to more efficiently generate hypotheses and elucidate treatment strategies.

*Keywords:* Down Syndrome, Mouse Model, Ts65Dn, Attribute, Spatial Memory, Spatial Processing, Temporal Processing, Sensory/Perceptual Processing, Executive Function, Motor Function, Rule-Based Memory

## Adaptation of the Arizona Cognitive Task Battery for use with the Ts65Dn Mouse Model of Down Syndrome

### Introduction

In order to design a battery of behavioral/neurocognitive tasks that could be presented to individuals with Down Syndrome across a wide age range in a single testing session, Edgin et al. (2010) developed and validated the Arizona Cognitive Task Battery (ACTB). What makes this battery different than others that are available at present (*e.g.*, Cambridge Neuropsychological Testing Automated Battery (CANTAB)) is that the ACTB has been developed to keep the following issues in mind: 1) when one studies a population with a neurodevelopmental disease, particularly a chromosomal aneuploidy, there is a very real possibility of floor effects confounding analyses of behavioral or cognitive task performance. 2) Additionally, individuals with Down Syndrome show language deficits, limiting the tasks that can be used to test cognitive function without a language confound. 3) Finally, and perhaps most importantly, the ACTB was developed with the goal of maximizing the sensitivity to identify effects that are present in Down Syndrome.

The IQ in Down Syndrome is typically moderately to severely intellectually disabled range (*i.e.*, IQ = 25-55) and mental age rarely moves beyond 8 years. Paradoxically, it has been suggested that early on, Down Syndrome only presents with a mild to moderate intellectual disability (*i.e.*, 55-70), but with age the IQ drops as mental age no longer increases with chronological age (Edgin et al., 2010; Virji-Babul, Kerns, Zhou, Kapur, & Shiffrar, 2006).

It has been hypothesized that visual-spatial abilities appear to be normal in Down Syndrome. However, this appears to be something of an artifact when visual-spatial memory is directly compared to auditory and verbal performance. In tests specifically assessing visual and spatial abilities in Down Syndrome, there is a clear deficit relative to typically developing or age matched control populations (Edgin et al., 2010, 2012; Pennington, Moon, Edgin, Stedron, & Nadel, 2003).

Within the memory domain, Down Syndrome results in deficits for digit or word span as well as general memory deficits with long delays prior to recall. Working memory, specifically verbal working memory, is disrupted in Down Syndrome (Edgin, Spano, Kawa, & Nadel, 2014; Pennington et al., 2003; Stedron, Sahni, & Munakata, 2005; Vicari, Bellucci, & Carlesimo, 2005). For visual and spatial memory, it appears that Down Syndrome results in specific memory deficits when memory span is increased (Carretti & Lanfranchi, 2010; S Lanfranchi, Carretti, Spano, & Cornoldi, 2009; Silvia Lanfranchi, Cornoldi, Vianello, & Conners, 2004). Again, as suggested by the language deficits, it has been shown that individuals with Down Syndrome have greater impairments for verbal than visual-spatial span. Down Syndrome also results in long term memory deficits (Pennington et al., 2003; Vicari, 2006).

Despite these memory deficits, implicit memory and perceptual priming appear to be normal (Pennington et al., 2003; Vicari, 2006). This pattern suggests that there is an explicit memory deficit in Down Syndrome, meaning that when memory requires temporal or spatial processing, there is a deficit. This has implicated hippocampus and medial temporal lobe function in Down Syndrome pathology, as well as the prefrontal cortex for working memory. Implicit memory, dependent upon different brain areas (*e.g.*, parietal cortex), appears to be spared, if not slightly facilitated in Down Syndrome compared to other cognitive domains (*i.e.*, word stem or perceptual priming tasks).

It has been shown that motor development in Down Syndrome is slower than age and mental age matched peers. Intriguingly, early motor markers like rolling and sitting up have been shown to be only very subtly slowed in Down Syndrome, but crawling and walking has been shown to be more dramatically delayed. Despite this delay, it does appear that children with Down Syndrome develop through the same milestones as typically developing children, these milestones just occur dramatically later in development. Motor skill development appear to show the same developmental delays as these early markers of motor abilities (Connolly & Michael, 1986; U. Frith & Frith, 1974;

Gemus et al., 2002; Rast & Harris, 1985; Vicari, 2006; Virji-Babul et al., 2006).

To date, the majority of behavioral assays used to test the behavioral phenotype of the mouse models of Down Syndrome have focused on spatial memory. More specifically, focus has been placed on the Morris water maze test of spatial memory (Escorihuela et al., 1995; Reeves et al., 1995; Sago et al., 1998). Later experiments have focused on novel object recognition at short and long delays as a proxy for general memory deficits observed across wide range of mouse disease models (Faizi et al., 2011). As a measure of executive function or rostral cortical function, spontaneous alternation has been used (A. M. Kleschevnikov et al., 2012, 2004). The majority of motor tests use the rotarod or locomotor behavior in an open field as the primary measure (Faizi et al., 2011).

In this study we propose and then evaluate a clear strategy to efficiently and comprehensively characterize neurobehavioral deficits in the Ts65Dn mouse model of Down Syndrome by developing a mouse variant of the Arizona Cognitive Task Battery (mACTB). This approach uses neurocognitive theory to design and select behavioral tasks that test specific hypotheses concerning the genetic disorder being studied-specifically those proposed as part of the Arizona Cognitive Task Battery (ACTB) used to study human populations with Down Syndrome (Edgin et al., 2010; Hunsaker, 2012a).

This approach specifically relies on known anatomical data regarding human and mouse model brain function as important considerations in task design and selection, similar to the ACTB (Edgin et al., 2010). This approach extends the utility of mouse models by integrating the expertise of clinical neurology and cognitive neuroscience into the mouse behavioral laboratory. Further, by directly emphasizing the reciprocal translation of research between human disease states and the associated mouse models, we demonstrate that it is possible for both groups to mutually inform each others' research to more efficiently generate hypotheses and elucidate treatment strategies (*cf.*, Hunsaker, 2012a, 2016).

## Materials and Methods

### Animals

In this study, 10 segmentally trisomic Ts(1716)65Dn (Ts65Dn) male mice and 10 age-matched wild type littermates were obtained from Jackson Laboratories (Bar Harbor, ME) and tested at 5-7 months of age, weighing 33 +/- 3.8g (standard error). The Ts65Dn/DnJ stock, commercially available from Jackson Laboratory, is homozygous for the wild type allele for retinal degeneration. The stock is maintained by repeated backcrossing of Ts65Dn females to B6EiC3H F1 hybrid males derived from a new congenic strain of C3H mice. This new congenic strain (C3Sn.BLiA-Pde6b+) lacks the blindness causing recessive mutant allele. Animals were kept on a 12-h light/dark cycle, in a temperature and humidity controlled environment with *ad libitum* access to food and water. All behavioral tests were conducted during the light portion of the cycle (06:00-18:00). Mice were housed in same-genotype groups of 2-3 per cage. Animal care and experimental testing procedures conformed to NIH, IACUC, and AALAC standards and protocols.

### Experimental Design for Behavioral Testing

The week prior to testing, all animals were handled daily for 15 min sessions and given an opportunity to habituate to a clear and red apparatus for at least 15 min each and acclimate to sucrose pellet rewards. Behavioral tasks emphasizing exploratory behaviors were presented in a pseudo-randomized order between mice (randomized within the Ts65Dn mice and a 2N wildtype littermate was yoked to a given Ts65Dn mouse to account for any potential task order effects), followed by spontaneous alternation and motor tasks, then response and reversal learning tasks.

After these tasks, mice received training on the cheeseboard, and then finally were presented with test designed to evaluate quality of life/adaptive functional measures to reduce the influence of any anxiety measures on later task performance.

To specifically isolate the contribution of spatial and nonspatial cues to task performance, behavioral tasks were run two times, once in a clear box and many extra maze cues, and a second time in a red box without extra maze cues (Dees & Kesner, 2013). The rationale for this procedure comes from work reported by Smith, Kesner, and Korenberg (2014) in Ts65Dn mice and Edgin et al. (2014) in children with Down Syndrome showing that context is particularly influential during object recognition tasks in children with Down Syndrome relative to typically developing children.

## Tests of Spatial Attribute

**Spatial Navigation using Cheeseboard.** Apparatus: A white, circular Plexiglas platform with a series of 2 cm diameter holes centered every 5 cm was used as the cheeseboard apparatus. The apparatus was placed approximately 1.5 m off the ground in a space surrounded by extra maze, distal cues to provide a rich spatial context to guide mouse navigation. Paths taken by the mice were recorded by an overhead camera and analyzed using Noldus EthoVision software.

Method: Each mouse was habituated to the cheeseboard for 30 min the day prior to experimentation with banana flavored sucrose pellets distributed in each hole (Bio-Serv, #F07257). At the beginning of each trial, a single sucrose reward pellet was placed in one of the holes of the cheeseboard (located within the midpoint of the North-East, North-West, South-East or South-West quadrant). A mouse was then released at one of the cardinal points (*e.g.*, North, South, East, or West at the edge of the cheeseboard) as latency in seconds and distance in centimeters traveled to locate and consume the reward was recorded. Each day, the mouse received a trial from each of the four cardinal directions (order randomized between mice and between days within mice). There were 5 minutes separating each trial for each mouse. After the fourth day of training, the mice were given a probe trial wherein there was no reward. The search patterns of the mice were evaluated This protocol was modified from the original rat protocol (Kesner,

Farnsworth, & DiMattia, 1989) for mice after experiments reported by Lopez, Hauser, Feldon, Gargiulo, and Yee (2010).

**Metric/Coordinate Processing.** Apparatus: The apparatus for these experiments consisted of a large Plexiglas box 40 cm wide by 40 cm deep with clear walls 40 cm in height and a dark gray floor. An inset made of translucent red Plexiglas 39 cm in width x 39 cm in height was constructed for easy insertion and removal from the original clear box, therefore enabling the experimenter to block distal cues in the testing environment when desired. The box was placed on a circular white table 1 m in diameter. Four distinct two-dimensional black and white cues were placed 30 cm away from each side of the box (methods after to Smith et al. (2014)). Exploration was recorded with an overhead video camera and the duration of exploration was measured with a stopwatch. Proximal objects were made from various washable, non-porous materials (plastic, metal, glass, etc.), 2-7 cm in height and had various color, pattern, and textures to ensure each object was visually distinct. To prevent use of olfactory cues to guide behavior, the boxes and objects were disinfected and deodorized with a sterilizing cleaning agent after each use. The mouse was presented with entirely novel object sets for every experiment. All locomotor activity was collected by the Noldus EthoVision software calibrated to measure to the nearest cm (Noldus USA, North Carolina).

Method: Each mouse had previously been habituated to clear and red experimental boxes. For the metric/coordinate processing test (Hunsaker, 2012a, 2013; Hunsaker, Kim, Willemsen, & Berman, 2012, 2009; Kesner et al., 2014; Smith et al., 2014), two objects were placed in the box separated by 25 cm (from inner edges) and mice were allowed to explore the objects for 15 minutes. After a 5 min interval during which the mice were covered by an opaque, heavy cup, the objects were moved closer together to an 8 cm separation and the mouse was allowed to explore for 5 min. This procedure was carried out in the clear box that allowed the mouse to see the extra-maze, distal cues as well as in the red box that blocked the ability of the mouse to see these cues (Dees & Kesner, 2013).

Exploration during the last 5 min of habituation and during the 5 min test session were converted into a ratio value ranging  $[-1,1]$  to control for overall exploration. As such, a ratio value approaching -1 is interpreted as the mouse showing continued habituation and thus not noticing the change. A ratio value approaching 1 suggest the mouse dramatically explored the change.

**Topological/Categorical Processing.** Apparatus: This experiment used the same apparatus as the Metric/Coordinate experiment. A similar ratio value was computed as a dependent measure.

Method: Each mouse had previously been habituated to clear and red experimental boxes. For the topological/categorical processing test (Hunsaker, 2012a, 2013; Hunsaker et al., 2012, 2009; Kesner et al., 2014; Lee et al., 2009; Smith et al., 2014), four objects were placed in a square in the box separated by 25 cm (from inner edges) and mice were allowed to explore the objects for 15 minutes. After a 5 min interval during which the mice were covered by a heavy cup, the front two objects were transposed, and the mouse was allowed to explore for 5 min. This procedure was carried out in the clear box that allowed the mouse to see the extra-maze, distal cues as well as in the red box that blocked the ability of the mouse to see these cues. Exploration during the last 5 min of habituation and during the 5 min test session were converted into a ratio value ranging  $[-1,1]$  to control for overall exploration. As such, a ratio value approaching -1 is interpreted as the mouse showing continued habituation and thus not noticing the change. A ratio value approaching 1 suggest the mouse dramatically explored the change in the object's spatial location and/or distance from each other.

**Spatial Location Recognition.** Apparatus: This experiment used the same apparatus as the Metric/Coordinate experiment. A similar ratio value was computed as a dependent measure.

Method: Each mouse had previously been habituated to clear and red experimental boxes. For the location recognition test (Smith et al., 2014), two objects were placed in

the box separated by 25 cm (from inner edges) and mice were allowed to explore the objects for 15 minutes. After a 5 min interval during which the mice were covered by a heavy cup, one of the objects was moved at a diagonal to a new location (still 25 cm separation between the two objects), and the mouse was allowed to explore for 5 min. This procedure was carried out in the clear box that allowed the mouse to see the extra-maze, distal cues as well as in the red box that blocked the ability of the mouse to see these cues. Exploration during the last 5 min of habituation and during the 5 min test session were converted into a ratio value ranging  $[-1,1]$  to control for overall exploration. As such, a ratio value approaching -1 is interpreted as the mouse showing continued habituation and thus not noticing the change. A ratio value approaching 1 suggest the mouse dramatically explored the change in which object occupied which spatial location.

## Tests of Temporal Attribute

**Temporal Ordering for Visual Objects.** Apparatus: This experiment used the same apparatus as the Metric/Coordinate experiment. A similar ratio value was computed as a dependent measure.

Method: During session 1, two identical copies of a first object (object 1) were placed at the ends of the box 2.5 cm from the end walls and centered between the long walls (Hunsaker, 2013; Hunsaker, Goodrich-Hunsaker, Willemsen, & Berman, 2010, 2012). The mouse was placed in the center of the box facing away from both objects. The mouse was given 5 min to freely explore the objects. After 5 min, the mouse was removed to a small holding cup for 5 min. During this time, the first objects were replaced with two duplicates of a second object (Object 2). For Session 2, the mouse was again placed in the apparatus and allowed to explore. After 5 min, the mouse was removed to the holding cup for 5 min and the objects were replaced with two duplicates of a third object (Object 3). For Session 3, the mouse was given 5 min to explore. After 5 min, the mouse was removed into a small cup for 5 min and an unused copy of the first and an unused copy of the third

object were placed into the box. The mouse was again placed into the box and allowed to explore the two objects (*i.e.*, Objects 1 and 3) during a 5 min test session. This procedure was carried out in the clear box that allowed the mouse to see the extra-maze, distal cues as well as in the red box that blocked the ability of the mouse to see these cues.

Exploration of each object during the test session were converted into a ratio value ranging  $[-1,1]$  to control for overall exploration. As such, a ratio value approaching -1 is interpreted as the mouse showing an absolute preference for the third over the first object. A ratio value approaching 1 suggest the mouse strongly explored the first over the third object.

### **Temporal Order Control - Novelty Detection for Visual Objects.**

Apparatus: This experiment used the same apparatus as the Metric/Coordinate experiment. A similar ratio value was computed as a dependent measure.

Method: In addition to reflecting impaired temporal ordering, increased exploration of the first object over the third could also be interpreted as being due to difficulty in remembering the first object prior to the test session (Hunsaker, 2012a, 2013; Hunsaker et al., 2010). To minimize and control for such general memory deficits, a novelty detection of visual objects task was performed. Briefly, on a different day mice received three sessions during which they were allowed to explore three novel sets of objects (Objects 4, 5, 6) similarly to the temporal ordering tasks. During the test session, the first object and a novel fourth object (Object 7) were presented and the mice were allowed 5 min to explore. This procedure was carried out in the clear box that allowed the mouse to see the extra-maze, distal cues as well as in the red box that blocked the ability of the mouse to see these cues. Exploration of each object during the test session were converted into a ratio value ranging  $[-1,1]$  to control for overall exploration. As such, a ratio value approaching -1 is interpreted as the mouse showing an absolute preference for the familiar over the novel object. A ratio value approaching 1 suggest the mouse strongly explored the novel over the familiar object.

## Sensory/Perceptual Attribute

**Feature Ambiguity.** Apparatus: This experiment used the same apparatus as the Metric/Coordinate experiment. A similar ratio value was computed as a dependent measure.

Method: Each mouse had previously been habituated to clear and red experimental boxes. For the configural recognition condition (Bartko, Winters, Cowell, Saksida, & Bussey, 2007; Bussey, Saksida, & Murray, 2002, 2006; Smith et al., 2014), mice were placed for 15 min in the red box containing two compound objects, A-B and C-D, separated by 15 cm. Following a 5 min delay under a heavy cup, the mouse underwent a 5-min Test Phase in which one object from the Study Phase remained the same (A-B) and the other compound object is created from one component of each of the previous familiar objects, (*e.g.*, A-D). That is, the "novel" object (A-D) was composed of the same elements, but rearranged into a novel configuration. Therefore, the object is "novel" by virtue of its configuration, not by its elements, each of which was present in one of the original compound stimuli. Exploration of each compound object was scored as a single unit. Exploration during the last 5 min of habituation and during the 5 min test session were converted into a ratio value ranging [-1,1] to control for overall exploration. As such, a ratio value approaching -1 is interpreted as the mouse showing continued habituation and thus not noticing the change. A ratio value approaching 1 suggest the mouse dramatically explored the change.

**Feature Ambiguity Control - Novelty Detection for Configuration of Objects.** Apparatus: This experiment used the same apparatus as the Metric/Coordinate experiment. A similar ratio value was computed as a dependent measure.

Method: Each mouse had previously been habituated to clear and red experimental boxes. For the configural recognition condition (Bartko et al., 2007; Bussey et al., 2002, 2006; Smith et al., 2014), mice were placed for 15 min in the red box containing two

compound objects, A-B and C-D, separated by 15 cm. Following a 5 min delay under a heavy cup, the mouse underwent a 5-min control task during which C-D was replaced by two never before seen objects (E-F) was also performed. This procedure was carried out in the clear box that allowed the mouse to see the extra-maze, distal cues as well as in the red box that blocked the ability of the mouse to see these cues. Exploration during the last 5 min of habituation and during the 5 min test session were converted into a ratio value ranging  $[-1,1]$  to control for overall exploration. As such, a ratio value approaching -1 is interpreted as the mouse showing continued habituation and thus not noticing the change. A ratio value approaching 1 suggest the mouse dramatically explored the change.

**Object Recognition at 1 and 24 Hour Delays.** Apparatus: This experiment used the same apparatus as the Metric/Coordinate experiment. A similar ratio value was computed as a dependent measure.

Method: Each mouse had previously been habituated to clear and red experimental boxes. For the object recognition test (Moore, Deshpande, Stinnett, Seasholtz, & Murphy, 2013; Smith et al., 2014), two objects were placed in the box separated by 25 cm (from inner edges) and mice were allowed to explore the objects for 15 minutes. After a 5 min interval during which the mice were covered by a heavy cup, one of the objects was replaced by a novel object that had never before been experienced by the mouse, and the mouse was allowed to explore for 5 min. This procedure was carried out in the clear box that allowed the mouse to see the extra-maze, distal cues as well as in the red box that blocked the ability of the mouse to see these cues. This procedure was carried out in each box separately for delays of 1 hour and 24 hours. Exploration during the last 5 min of habituation and during the 5 min test session were converted into a ratio value ranging  $[-1,1]$  to control for overall exploration. As such, a ratio value approaching -1 is interpreted as the mouse showing continued habituation and thus not noticing the change. a ratio value approaching 1 suggest the mouse dramatically explored the change.

## Tests of Executive Function

**Spontaneous Alternation.** Apparatus: For this experiment, a Y maze with each arm measuring 45 cm in length by 30 cm in height with a runway width of 6 cm was used. It was made from opaque gray Plexiglas to prevent the use of any extra-maze cues to guide behavioral performance.

Method: Mice were placed in the stem of a Y maze and allowed to explore (Faizi et al., 2011; A. M. Kleschevnikov et al., 2012, 2004). Whenever the mouse entered one of the arms of the Y maze with all four limbs their response was recorded. Upon reaching the end of the arm, the mouse was gently picked up and replaced in the stem of the Y maze. The number of times the mouse alternated (*i.e.*, did not repeat the previous turn), was recorded as an alternation.

**Response Learning.** Apparatus: For this experiment, a plus maze with each arm measuring 50 cm in length by 25 cm in height with a runway width of 8 cm was used. It was made from opaque gray Plexiglas to prevent the use of any extra-maze cues to guide behavioral performance. At any time the mouse was required to make a 90 degree turn to the right or left to make a choice. The remaining arm was blocked off using a gray Plexiglas block that fit snugly into the arms of the plus maze.

Method: Mice were placed in the stem of a plus maze with one of the arms blocked off (forming a T maze). Mice were given five trials to determine if there was any preference for one direction over the other. As no such preference was observed, mice were randomly assigned the rule to turn right or turn left. Mice received 20 trials per day for 4 days (Bissonette et al., 2008; Ragozzino, Detrick, & Kesner, 1999, 2002). Entry into an arm with all four limbs was recorded as a choice and mice were not allowed to self correct when they made mistakes. Upon reaching the end of the arm, the mouse was gently picked up and replaced in the stem of the plus maze.

**Reversal Learning.** Apparatus: This experiment is a continuation of the Response acquisition experiment and used the same apparatus.

Method: The day after mice finished training on response learning, they received 80 trials of reversal training (Bissonette et al., 2008; Ragozzino et al., 1999, 2002). This means that the turn the mice had just learned to make for reward was now incorrect, rather the mice had to make the opposite turn to receive reward. Upon reaching the end of the arm, the mouse was gently picked up and replaced in the stem of the plus maze. Number of previously correct choices made were recorded as errors and error type was evaluated as perseverative or regressive based on the work of Aggleton and Ragozzino (Ragozzino et al., 2002; E. C. Warburton, Baird, Morgan, Muir, & Aggleton, 2001; E. Warburton, Baird, Morgan, Muir, & Aggleton, 2000). Briefly, errors during trials 1-20 were considered perseverative errors (perseverating or inflexibly following a previously learned rule) and errors during trials 21-40 were considered regressive errors (regressing or returning to a previously learned rule). Additionally, a behavioral change point algorithm was used to define the point at which each mouse consistently switched their responses from the previously learned rule to the new rule. This was done after the work of Diep et al. (2012) by taking the derivative of the learning curve at each point and evaluating when the derivative significantly changed slope.

## Motor Function

**Capellini Handling.** Apparatus: For this experiment, a 250 mL Nalgene beaker was used as a testing environment to assist in video recording mouse behavior. A small mirror was set up behind the beaker and the camera was placed to capture a front and rear view of the mouse to record trials.

Method: Mice were habituated over a weekend to dried capellini pasta in their cages (Tennant et al., 2010). Each mouse was placed in a 250 mL beaker and given a 5 cm piece of dried capellini. Their behaviors while eating were recorded for an offline analysis of their motor behaviors. Their latency to finish each piece of pasta was recorded, as were abnormal behaviors including the mouse having its paws together while eating, losing

contact with the pasta with one or both paws, and using the mouth to pull the pasta rather than using the digits to feed the pasta into the mouth.

**Parallel Rung Walking.** Apparatus: Mice were placed in a box measuring 15 cm wide by 15 cm deep by 45 cm tall with 1.5 mm diameter parallel rungs making up the floor. The rungs were designed with same spacing used by Hunsaker et al. (2011). However, as this was a box rather than a runway, locomotor activity was collected using the Noldus EthoVision software to evaluate any effects of locomotor activity on motor coordination.

Method: The mice were allowed to freely explore the box for 5 minutes (Cummings, Engesser-Cesar, Cadena, & Anderson, 2007; Farr, Liu, Colwell, Whishaw, & Metz, 2006; Hunsaker et al., 2011). The number of times a paw slipped through the parallel rod floor beyond the wrist or ankle, a "foot slip" error was recorded. Total number of steps was also recorded to be used as an adjustment factor in later analyses.

## Adaptive Function

**Nesting Behaviors.** Apparatus: A 10 cm long piece of 5 cm diameter PVC pipe capped at one end was used as the apparatus. Sawdust similar to that used as mouse bedding was used as a nesting substrate.

Method: Sawdust was used to fill a 10 cm long piece of 5 cm diameter PVC pipe that was capped at one end (dry fit, no glue was used). This pipe was placed in a cage with each mouse and the latency to contact the sawdust in the pipe, the latency to start digging in the sawdust, and the latency to finalize the nest were recorded (Filali & Lalonde, 2009).

**Neophobia.** Apparatus: The home cage of the mouse, a 35 cm diameter metal platter, and a novel white Plexiglas box measuring 15 cm in all dimension were used to assess neophagia.

Method: Mice were given three neophobia tests based on the work of Bannerman

et al. (2002). The first was in each mouse's home cage. Each mouse was provided a food they had never encountered (Cheerios cereal) and the latency to take the first bite was recorded. The second test was each mouse was placed on a large platter in a bright area in the testing room and the latency to take a bite from a reward pellet (familiar food) was recorded. The final test consisted of each mouse being placed in a novel white box and fed a Cheerio that had been stored in a sealed container filled with thyme overnight, resulting in a novel food. Again, latency to take the first bite was recorded.

## Statistical Methods

**Dependent Measures and Data Visualization.** For the Dry Land Watermaze on the cheeseboard, mean latency to reach the rewarded location as well as total path length were collected using the EthoVision software. The learning curves were normalized to percentage of 1st day latencies and distances to specifically ascertain if there were differences in the shape of the learning curves.

For the probe trial, mean distance from the reward location as well as percent time in the quadrant of the cheeseboard containing the previously rewarded location were collected.

For all exploratory tasks (Spatial, Temporal, and Sensory/Perceptual tasks), ratio values were computed after the following formula: Exploration of the object of interest (or all objects in the 5 min session of interest) minus the exploration of the other objects or last 5 min of the habituation session. This was divided by the sum of all exploration across both sessions or of both objects. As a formula this is depicted as:  $(A-B)/(A+B)$ .

For the reversal learning, the number of perseverative errors (continuing old rule) during the first 20 (1-20) trials were computed. The number of regressive errors (returning to old rule) were calculated during trials 21-40. A frequentist change point algorithm developed by Gallistel, Fairhurst, and Balsam (2004) and translated in the R programming language by Diep et al. (2012) was used to compute the point at which each mouse showed

evidence for having learned to apply the new rule (analysis code available for download at [http://github.com/mrhunsaker/Change\\_Point](http://github.com/mrhunsaker/Change_Point)). This code takes the derivative of the learning curve at every point and determines when the slope has significantly changed. The threshold for significant change was conservatively set at  $p < .001$  for the current task.

Data were all plotted in DataGraph (4.01 beta, Visual Data Tools, Inc. Chapel Hill, NC.). Ratio data and computed factors are plotted as bar graphs with standard error of the mean (SEM) error bars. Repeated data/learning curves are presented as a line graph at the mean of each block with SEM error bars.

**Tests for equal variance and heteroscedasticity.** Prior to statistical analyses, the data were tested for normalcy (Shapiro-Wilk test) and homoscedacity (Browne-Forsythe test) to determine if the data met the assumptions for parametric analyses of variance (ANOVA). Repeated measures were evaluated for sphericity using Mauchly's test of sphericity and necessary adjustments were made using the Huhn-Feldt correction using R 3.2.4 (Team, 2014).

**Parametric Statistical Analysis.** Once deemed appropriate, further statistical analyses were performed using parametric analyses of variance (ANOVA). For exploratory task ratios and computed factors were compared using a one-way ANOVA with groups (2N control, Ts65Dn). For acquisition tasks wherein learning was quantified across trials as well as locomotor data, statistical analyses were performed using a mixed model ANOVA with group (2N control, Ts65Dn) as a between groups factor and block of trials as a repeated within factor. If locomotor activity was significantly different between the groups during any trial, locomotor activity was included in the statistical analysis as a covariate.

All results were considered significant at an  $\alpha < .05$  and Power  $(1-\beta) > .80$ : Analyses were performed to determine observed power and effect size for all reported effects. Statistical analyses were performed in R 3.2.4 language and environment and observed statistical power was calculated using both R and the statistical program G\*Power 3

(Faul, Erdfelder, Buchner, & Lang, 2009, 2007). All reported p values were adjusted for False Discovery Rate (Benjamini, Drai, Elmer, Kafkafi, & Golani, 2001) using a custom script written in R 3.2.4 (Team, 2014).

## Results

### Spatial Attribute

**Cheeseboard.** To evaluate spatial navigation and general spatial memory, mice were tested on a dry land version of the Morris water maze (cheeseboard). The Ts65Dn mice showed deficits relative to 2N control mice for raw latency to find reward (Figure 1a; groups ( $F(1,76)=185.645$ ,  $p<.0001$ ), no interaction among group and trial block ( $F(1,76)=0.333$ ,  $p=.566$ )). These deficits are present as well when the data are adjusted for total latency on trial 1 (groups ( $F(1,76)=48.44$ ,  $p<.0001$ ); Figure 1b) Ts65Dn mice have impaired learning in the Ts65Dn mice in the adjusted data ( $F(1,76)=14.74$ ,  $p=.00025$ ). The same pattern of effects was observed for the data when evaluated for raw distance covered to find reward (Figure 1c; groups ( $F(1,76)=88.406$ ,  $p<.0001$ ) no interaction among group and block ( $F(1,76)=0.258$ ,  $p=.613$ ). Similarly to the latency data, an interaction emerges with Ts65Dn mice showing a shallower learning curve when the data are adjusted for total distance on trial 1 (groups ( $F(1,76)=25.194$ ,  $p<.0001$ ), interaction ( $F(1,76)=3.887$ ,  $p=.0523$ ); Figure 1d).

During the probe trial (Figure 1), Ts65Dn mice spent significantly less time in the quadrant where the reward was previously located (Figure 1e,  $F(1,18)=91.25$ ,  $p<.0001$ ). Ts65Dn mice also on average were a further distance away from the previously rewarded spatial location ( $F(1,18)=41.7$ ,  $p<.0001$ ; Figure 1f).

**Metric/Coordinate processing.** To evaluate dentate gyrus dependent spatial processing, mice were tested for detection of a metric change (Figure 2a), Ts65Dn mice showed significant impairments relative to 2N control mice. There was a main effect for groups for the clear box ( $F(1,18)=39.38$ ,  $p<.0001$ ) as well as the red box ( $F(1,18)=29.94$ ,

$p < .0001$ ). Deficits in both the clear and red box suggest that metric/coordinate processing is specifically impaired in Ts65Dn mice, supporting earlier reports of dentate gyrus dysfunction in Ts65Dn mice.

**Topological/Categorical processing.** To evaluate parietal lobe dependent spatial processing, mice were tested for detection of a topological change (Figure 2b), Ts65Dn mice showed significant impairments relative to 2N control mice. There was a main effect for groups for the clear box ( $F(1,18)=78.52$ ,  $p < .0001$ ) but not for the red box ( $F(1,18)=1.489$ ,  $p=.238$ ). Deficits in only the clear box suggests that topological processing is only impaired when extra-maze cues are present, suggesting a general spatial memory deficit rather than one specific to topological/categorical processing.

**Location Recognition.** To test general spatial memory, mice were tested for detection of a change in the spatial location of a visual object (Figure 2c), Ts65Dn mice showed significant impairments relative to 2N control mice. There was a main effect for groups for the clear box ( $F(1,18)=36.39$ ,  $p < .0001$ ) as well as in the red box ( $F(1,18)=62.0$ ,  $p < .0001$ ), suggesting spatial novelty detection deficits in Ts65Dn mice.

## Temporal Attribute

**Temporal Ordering of Visual Objects.** To test CA1 function in Ts65Dn mice, mice were tested for a simple temporal ordering task (Figure 2d). Ts65Dn mice did not show significant impairments relative to 2N control mice. There was a main effect for groups for the clear box ( $F(1,18)=68.24$ ,  $p < .0001$ ) but not for the red box ( $F(1,18)=2.267$ ,  $p=.149$ ). These data suggest that the presence of spatial cues, but not temporal ordering resulted in deficits in the clear box. For the novelty detection task run as a control for temporal ordering (Figure 2e), Ts65Dn mice did not show significant impairments relative to 2N control mice. There was a main effect for groups for the clear box ( $F(1,18)=82.78$ ,  $p < .0001$ ) but not for the red box ( $F(1,18)=2.909$ ,  $p=.105$ ). These data suggest that the presence of spatial cues, but not temporal ordering or novelty detection resulted in deficits

in the clear box.

## Sensory/Perceptual Attribute

**Feature Ambiguity.** To test perirhinal function in Ts65Dn mice, a configural feature ambiguity test was given (Figure 3a). Ts65Dn mice did not show significant impairments relative to 2N control mice. There was a main effect for groups for the clear box ( $F(1,18)=34.13$ ,  $p<.0001$ ) but not for the red box ( $F(1,18)=.021$ ,  $p=.984$ ). These data suggest that the presence of spatial cues, but not configural feature ambiguity resulted in deficits in the clear box. Ts65Dn mice were not impaired in a configural ambiguity control task (Figure 3b). There was a main effect for groups for the clear box ( $F(1,18)=12.27$ ,  $p=.0025$ ) but not for the red box ( $F(1,18)=.012$ ,  $p=.916$ ). These data suggest that the presence of spatial cues, but not configural feature novelty detection ordering resulted in deficits in the clear box.

**Object Recognition after 1 and 24 delays.** Object memory was tested in Ts65Dn mice using object recognition memory at 1 and 24 hours (Figure 3c), Ts65Dn mice did not show significant impairments relative to 2N control mice. There was a main effect for groups for the clear box ( $F(1,18)=29.51$ ,  $p<.0001$ ) but not for the red box ( $F(1,18)=.908$ ,  $p=.353$ ). These data suggest that the presence of spatial cues, but not object recognition resulted in deficits in the clear box. For object recognition memory at 24 hours (Figure 3d), there was a main effect for groups for the clear box ( $F(1,18)=46.23$ ,  $p<.0001$ ) as well as for the red box ( $F(1,18)=31.36$ ,  $p<.0001$ ). These data suggest that at 24 hours, the Ts65Dn mice were unable to retrieve the memory for the object, whereas they were able to do so at 1 hour.

## Executive Function

**Spontaneous Alternation.** Spontaneous alternation was used to test working memory in the Ts65Dn mice (Figure 4a). Ts65Dn mice showed fewer alternations than 2N control mice ( $F(1,18)=23.85$ ,  $p=.0001$ ).

**Rule Learning on a Plus Maze.** To evaluate inhibitory control and the ability to learn a turn response (Figure 4b), Ts65Dn mice took significantly longer to learn the rule than 2N control mice. There was a main effect for groups ( $F(1,76)=4.24$ ,  $p=.013$ ), a main effect for block of trials ( $F(1,76)=502.86$ ,  $p<.0001$ ). There was also an interaction among group and block ( $F(1,76)=7.82$ ,  $p=.0065$ ). This interaction was the result of the Ts65Dn mice taking longer to learn the rule. For the final block of 20 trials, there were no differences in performance for Ts65Dn and 2N control mice.

**Rule Reversal Learning on a Plus Maze.** To evaluate rule reversal learning (behavioral flexibility) in Ts65Dn mice, the reversal of a turn response was evaluated (Figure 4c). Ts65Dn mice took a significantly greater number of trials to learn the rule than 2N control mice. There was a main effect for groups ( $F(1,76)=4.952$ ,  $p=.029$ ), a main effect for block of trials ( $F(1,76)=24.62$ ,  $p<.0001$ ). There was also a trend toward there being an interaction among group and block ( $F(1,76)=3.21$ ,  $p=.077$ ). This nonsignificant interaction was the result of the Ts65Dn mice taking longer to learn to reverse the rule. In fact, the Ts65Dn mice were only impaired relative to the 2N control mice for the first block of 20 trials. For the remaining blocks of trials there were no differences in performance for Ts65Dn and 2N control mice. There was a main effect for groups for the trial at which the mice changed preference from old rule to new rule (changepoint;  $F(1,18)=21.43$ ,  $p=.0002$ ; Figure 4d). For the first 20 trials of reversal learning, Ts65Dn mice showed a greater number of perseverative errors ( $F(1,18)=11.98$ ,  $p=.0028$ ; Figure 4e). For trials 21-40, there was no difference between Ts65Dn mice and 2N control mice for regressive errors ( $F(1,18)=.287$ ,  $p=.599$ ; Figure 4f).

## Motor Function

**Capellini Eating Task.** For the capellini task of manual dexterity (Figure 5), Ts65Dn mice showed significant impairments relative to 2N control mice. There was a main effect for latency, with Ts65Dn mice taking longer to eat the pasta on average

( $F(1,18)=14.74$ ,  $p=.0012$ ; Figure 5a). Ts65Dn mice also made a greater number of pasta handling errors ( $F(1,18)=92.68$ ,  $p<.0001$ ; Figure 5b). There was also a main effect for groups for the number of times the paws came together ( $F(1,18)=42.34$ ,  $p<.0001$ ; Figure 5c), for the number of times the mouse lost contact with the pasta ( $F(1,18)=20.35$ ,  $p=.0003$ ; Figure 5d) and the number of times the mouse pulled the pasta with their mouth rather than using the hands to move it ( $F(1,18)=21.46$ ,  $p=.0002$ ; Figure 5e).

**Parallel Rung Walking Task.** During a parallel rung walking task (Figure 5f), Ts65Dn mice showed significant impairments relative to 2N control mice. There was a main effect for the number of foot slips in a 1 minute session ( $F(1,18)=27.32$ ,  $p<.0001$ ). When adjusted for number of steps, Ts65Dn mice still showed a greater number of foot slip errors ( $F(1,18)=11.70$ ,  $p=.0031$ ; Figure 5g).

## Adaptive Function / Quality of Life

**Nesting Behavior.** Ts65Dn mice showed significant impairments relative to 2N control mice for measures of nesting (Figure 6). Ts65Dn mice took longer to make contact with the nesting material ( $F(1,18)=152.9$ ,  $p<.0001$ ; Figure 6a), for the time it took for them to dig in the media (measured from time of first contact) ( $F(1,18)=318.6$ ,  $p<.0001$ ; Figure 6b), and the time it took from starting to dig to finish the nest ( $F(1,18)=94.3$ ,  $p<.0001$ ; Figure 6c).

**Neophobia.** Ts65Dn mice showed significant impairments relative to 2N control mice for neophobia (Figure 6). Ts65Dn mice took longer to eat a novel food in a familiar environment ( $F(1,18)=19.59$ ,  $p=.0003$ ; Figure 6d), took longer to eat a familiar food in a novel environment ( $F(1,18)=40.87$ ,  $p<.0001$ ; Figure 6e), and took longer to eat a novel food in a novel environment ( $F(1,18)=83.74$ ,  $p<.0001$ ; Figure 6f).

## Discussion

Briefly, Ts65Dn mice displayed specific deficits for spatial processing, long term memory, motor function, executive function, and adaptive function. These deficits

phenocopy the results from the ACTB used in testing children with Down Syndrome, including the report that providing distracting contextual cues may impair memory function in Down Syndrome (Edgin et al., 2010, 2012, 2014).

Overall, these data clearly demonstrate that the Ts65Dn mouse do in fact show a similar pattern of behavioral deficits on the mouse variant of the Arizona Cognitive Task Battery (mACTB) as individuals with Down Syndrome show on the human ACTB. The task similarities between the mouse and human ACTB are outlined in Table 1. In cases where Down Syndrome participants show deficits on the ACTB (Edgin et al., 2010), the mice in the present study phenocopy those effects (also *cf.*, Edgin et al. (2012)).

The pattern of Ts65Dn performance on spatial and temporal processing tasks support the hypothesis that Ts65Dn mice show clear deficits for spatial processing tasks dependent upon the dentate gyrus with sparing of spatial and temporal processing dependent upon the CA1 subregion (Goodrich-Hunsaker, Hunsaker, & Kesner, 2008; Kesner, Lee, & Gilbert, 2004; Kesner & Rolls, 2015; Rolls & Kesner, 2006; Smith et al., 2014). Similarly, it appears that spatial processing dependent on neocortical processing is spared (*cf.*, Goodrich-Hunsaker, Hunsaker, and Kesner (2005)).

These findings were confirmed by verifying that any spatial or temporal processing deficits observed in the presence of distal cues was confirmed in a task that removed these cues (Dees & Kesner, 2013). The data show that metric/coordinate processing and location recognition deficits are similar in the presence or absence of distal cues, suggesting that these hippocampus (more specifically the dentate gyrus) dependent spatial processes are disrupted. The topological/categorical deficits observed in the clear box are absent when tested in the absence of extramaze cues in a red box. These data suggest that CA1/parietal cortex related spatial memory processes are intact when tested without extra-maze cues available.

Similarly, the temporal ordering deficits present in the clear box were absent in the red box, and the novelty detection control task showed the same pattern, suggesting

temporal processing is intact in the Ts65Dn mice, but object identification may be impaired if extra-maze distal cues are present. This hypothesis was confirmed in the sensory/perceptual tests wherein the Ts65Dn mice were able to correctly process feature ambiguity and feature novelty in the red, but not clear boxes. And finally, object recognition was impaired even at only 1 hour delays for Ts65Dn mice when extramaze cues were available. In the red box, the Ts65Dn mice were able to identify previously encountered objects until a 24 hour delay was imposed.

For response learning or executive function, Ts65Dn mice were impaired for spontaneous alternation (they alternated on fewer trials than wildtype mice), as well as response learning and reversal learning of a previously learned rule. However, it appeared that the Ts65DN mice just learned the tasks more slowly since the early trials show deficit, but later blocks of trials do not. For reversal learning, it is clear the Ts65Dn mice take a greater number of trials to learn the reversal based on the changepoint calculated for the learning curves (Ts65Dn mean=50 compared to mean=30 for 2N wildtype mice) as well as the greater number of perseverative errors during trials 1-20 of the reversal learning task. Interestingly, once the Ts65Dn mice showed learning of the reversal, they did not make any more regressive errors than the 2N control mice.

These data support earlier theories that suggested there were specific deficits to spatial memory in Down Syndrome (Carlesimo, Marotta, & Vicari, 1997; Carretti & Lanfranchi, 2010; S Lanfranchi et al., 2009; Silvia Lanfranchi et al., 2004; Vicari et al., 2005; Visu-Petra, Benga, & Miclea, 2007). What these data clarify are the neural substrates and specific domains of medial temporal lobe function are impaired in Down Syndrome. There are specific deficits on tasks that test dentate gyrus function, but sparing of function on tasks that test parietal and perirhinal cortices as well as CA1 function. Similarly, there are specific deficits in the Ts65Dn mouse that are attributable to cerebellar function and executive functional deficits attributable to the rostral cortices (analogue of the human prefrontal cortex).

For the motor tasks, the Ts65Dn mice showed clear deficits for handling the capellini and greater difficulties walking on parallel rungs. For adaptive function, the Ts65Dn mice took longer to build nests and consume novel foods in novel locations, suggesting reduced adaptive function or quality of life relative to 2N control mice.

An important consideration in adopting a behavioral screen like this mACTB is the relative throughput for the tasks. All of the tasks used to test medial temporal lobe function take 30 minutes per session of testing, and can be repeated numerous times on any given mouse after 24 hours have passed since the first test. The motor and adaptive function tests are similarly high throughput, as is the spontaneous alternation task. The only tasks that require a significant time investment are the dry land watermaze (Lopez et al., 2010) on the cheeseboard and the rule acquisition and rule reversal learning tasks (Bissonette et al., 2008; Ragozzino et al., 1999, 2002). The dry land watermaze task on the cheeseboard follows a standard water maze protocol that lasts 5 days, and the response learning and reversal learning tasks together take an additional week.

A second consideration in adopting the mACTB is the advantage of the anatomical specificity of known neural substrates underlying each behavioral task (Goodrich-Hunsaker et al., 2005, 2008; Hunsaker, 2012a; Kesner et al., 2004; Kesner & Rolls, 2015) and previous comparison of rodent performance on many of the behavioral tasks to human cognitive function (Baumann, Chan, & Mattingley, 2012; Baumann & Mattingley, 2013; Goodrich-Hunsaker & Hopkins, 2010; Kesner & Goodrich-Hunsaker, 2010). As such, these tasks can be used to dissociate function of brain areas within the mouse models being tested. The final consideration is the lack of negative reinforcement or aversive stimulus. This means mouse models displaying depression, anxiety, or anhedonia are theoretically testable using the mACTB (*cf.*, Hunsaker (2012a, 2012b)).

An interesting complication emerged in the data that the mACTB was solved by nature of how it was designed. On a number of nonspatial tasks, there was a confound of distal cues interfering with the processing of proximal objects that were of interest in the

task. For example, in the temporal ordering and novelty detection for novel objects tasks, the Ts65Dn mice looked like they had deficits, but only in the clear box that allowed access to distal cues (Dees & Kesner, 2013). The feature ambiguity task and the control condition showed the same pattern. The addition of a distal cue-free condition (the red box) was essential for separating the effects of proximal-distal cue interactions from the memory processes being tested by the tasks. The disparate performance across clear and red boxes (or in presence of absence of extra maze contextual cues) allowed us to assess the role of context and distracting cues in memory function in Ts65Dn mice, a conceptual replication of Edgin et al. (2014).

## Limitations

The primary limitation of the present study is the lack of tests for language or language like attributes in the Ts65Dn mouse model. However, such assays exist and can easily be added to the task battery without significantly increasing the amount of time required to perform the mACTB (Zampieri, Fernandez, Pearson, Stasko, & Costa, 2014). The present experiment also only assayed the Ts65Dn mouse model of Down Syndrome as a proof of concept. Further studies will be necessary to evaluate whether other mouse models of Down Syndrome (*e.g.*, Ts2Cje, Ts1Yah, and Dep(17)1Yey/+; Das and Reeves (2011)) show the same pattern of results as the Ts65Dn mouse model.

## Conclusions

That deficits in the mouse and human ACTB are comparable suggests that the mACTB may be useful for guiding the development of treatment strategies by providing reliable, valid behavioral endpoints and outcome measures. These outcome measures reported in the mACTB appear to show high face, content, and predictive validity with the ACTB, at least so far as Ts65Dn performance mimics the performance of Down Syndrome patient populations. As we were able to identify such a clear phenotype in Ts65Dn mice, the mouse mACTB may well turn out to be a useful tool for studying

behavioral prodrome of early Alzheimer-like pathology and cognitive decline in mouse models related to Down Syndrome. Similarly, the mACTB may serve as a powerful and comprehensive screening tool for preclinical tests of pharmacological interventions in Down Syndrome.

## References

- Bannerman, D., Deacon, R., Offen, S., Friswell, J., Grubb, M., & Rawlins, J. (2002). Double dissociation of function within the hippocampus: spatial memory and hyponeophagia. *Behavioral neuroscience*, 116(5), 884.
- Bartko, S. J., Winters, B. D., Cowell, R. A., Saksida, L. M., & Bussey, T. J. (2007). Perirhinal cortex resolves feature ambiguity in configural object recognition and perceptual oddity tasks. *Learning & Memory*, 14(12), 821–832.
- Baumann, O., Chan, E., & Mattingley, J. B. (2012). Distinct neural networks underlie encoding of categorical versus coordinate spatial relations during active navigation. *Neuroimage*, 60(3), 1630–1637.
- Baumann, O. & Mattingley, J. B. (2013). Dissociable roles of the hippocampus and parietal cortex in processing of coordinate and categorical spatial information. *Frontiers in human neuroscience*, 8, 73–73.
- Benjamini, Y., Drai, D., Elmer, G., Kafkafi, N., & Golani, I. (2001). Controlling the false discovery rate in behavior genetics research. *Behavioural brain research*, 125(1), 279–284.
- Bissonette, G. B., Martins, G. J., Franz, T. M., Harper, E. S., Schoenbaum, G., & Powell, E. M. (2008). Double dissociation of the effects of medial and orbital prefrontal cortical lesions on attentional and affective shifts in mice. *The Journal of Neuroscience*, 28(44), 11124–11130.
- Bussey, T. J., Saksida, L. M., & Murray, E. A. (2002). Perirhinal cortex resolves feature ambiguity in complex visual discriminations. *European Journal of Neuroscience*, 15(2), 365–374.
- Bussey, T. J., Saksida, L. M., & Murray, E. A. (2006). Perirhinal cortex and feature-ambiguous discriminations. *Learning & Memory*, 13(2), 103–105.

- Carlesimo, G. A., Marotta, L., & Vicari, S. (1997). Long-term memory in mental retardation: evidence for a specific impairment in subjects with down's syndrome. *Neuropsychologia*, 35(1), 71–79.
- Carretti, B. & Lanfranchi, S. [S]. (2010). The effect of configuration on vswm performance of down syndrome individuals. *Journal of Intellectual Disability Research*, 54(12), 1058–1066.
- Connolly, B. H. & Michael, B. T. (1986). Performance of retarded children, with and without down syndrome, on the bruininks oseretsky test of motor proficiency. *Physical Therapy*, 66(3), 344–348.
- Cummings, B. J., Engesser-Cesar, C., Cadena, G., & Anderson, A. J. (2007). Adaptation of a ladder beam walking task to assess locomotor recovery in mice following spinal cord injury. *Behavioural brain research*, 177(2), 232–241.
- Das, I. & Reeves, R. H. (2011). The use of mouse models to understand and improve cognitive deficits in down syndrome. *Disease Models and Mechanisms*, 4(5), 596–606.
- Dees, R. L. & Kesner, R. P. (2013). The role of the dorsal dentate gyrus in object and object-context recognition. *Neurobiology of learning and memory*, 106, 112–117.
- Diep, A. A., Hunsaker, M. R., Kwock, R., Kim, K., Willemsen, R., & Berman, R. F. (2012). Female cgg knock-in mice modeling the fragile x premutation are impaired on a skilled forelimb reaching task. *Neurobiology of learning and memory*, 97(2), 229–234.
- Edgin, J. O., Mason, G. M., Allman, M. J., Capone, G. T., DeLeon, I., Maslen, C., ... Nadel, L. (2010). Development and validation of the arizona cognitive test battery for down syndrome. *Journal of neurodevelopmental disorders*, 2(3), 149.
- Edgin, J. O., Mason, G. M., Spano, G., Fernández, A., & Nadel, L. (2012). 7 human and mouse model cognitive phenotypes in down syndrome: implications for assessment. *Progress in brain research*, 197, 123.

- Edgin, J. O., Spano, G., Kawa, K., & Nadel, L. (2014). Remembering things without context: development matters. *Child development*, 85(4), 1491–1502.
- Escorihuela, R. M., Fernández-Teruel, A., Vallina, I. F., Baamonde, C., Lumbreras, M. A., Dierssen, M., ... Flórez, J. (1995). A behavioral assessment of ts65dn mice: a putative down syndrome model. *Neuroscience letters*, 199(2), 143–146.
- Faizi, M., Bader, P. L., Tun, C., Encarnacion, A., Kleschevnikov, A., Belichenko, P., ... Mobley, W. C., et al. (2011). Comprehensive behavioral phenotyping of ts65dn mouse model of down syndrome: activation of beta 1-adrenergic receptor by xamoterol as a potential cognitive enhancer. *Neurobiology of Disease*, 43(2), 397–413.
- Farr, T. D., Liu, L., Colwell, K. L., Whishaw, I. Q., & Metz, G. A. (2006). Bilateral alteration in stepping pattern after unilateral motor cortex injury: a new test strategy for analysis of skilled limb movements in neurological mouse models. *Journal of neuroscience methods*, 153(1), 104–113.
- Faul, F., Erdfelder, E., Buchner, A., & Lang, A.-G. (2009). Statistical power analyses using g\* power 3.1: tests for correlation and regression analyses. *Behavior research methods*, 41(4), 1149–1160.
- Faul, F., Erdfelder, E., Lang, A.-G., & Buchner, A. (2007). G\* power 3: a flexible statistical power analysis program for the social, behavioral, and biomedical sciences. *Behavior research methods*, 39(2), 175–191.
- Filali, M. & Lalonde, R. (2009). Age-related cognitive decline and nesting behavior in an appswe/ps1 bigenic model of alzheimer’s disease. *Brain research*, 1292, 93–99.
- Frith, U. & Frith, C. D. (1974). Specific motor disabilities in downs syndrome. *Journal of Child Psychology and Psychiatry*, 15(4), 293–301.
- Gallistel, C. R., Fairhurst, S., & Balsam, P. (2004). The learning curve: implications of a quantitative analysis. *Proceedings of the national academy of Sciences of the united States of america*, 101(36), 13124–13131.

- Gemus, M., Palisano, R., Russell, D., Rosenbaum, P., Walter, S. D., Galuppi, B., & Lane, M. (2002). Using the gross motor function measure to evaluate motor development in children with down syndrome. *Physical & Occupational Therapy in Pediatrics*, 21(2-3), 69–79.
- Goodrich-Hunsaker, N. J. & Hopkins, R. O. (2010). Spatial memory deficits in a virtual radial arm maze in amnesic participants with hippocampal damage. *Behavioral neuroscience*, 124(3), 405.
- Goodrich-Hunsaker, N. J., Hunsaker, M. R., & Kesner, R. P. (2005). Dissociating the role of the parietal cortex and dorsal hippocampus for spatial information processing. *Behavioral neuroscience*, 119(5), 1307.
- Goodrich-Hunsaker, N. J., Hunsaker, M. R., & Kesner, R. P. (2008). The interactions and dissociations of the dorsal hippocampus subregions: how the dentate gyrus, ca3, and ca1 process spatial information. *Behavioral neuroscience*, 122(1), 16.
- Hunsaker, M. R. (2012a). Comprehensive neurocognitive endophenotyping strategies for mouse models of genetic disorders. *Progress in neurobiology*, 96(2), 220–241.
- Hunsaker, M. R. (2012b). The importance of considering all attributes of memory in behavioral endophenotyping of mouse models of genetic disease. *Behavioral neuroscience*, 126(3), 371.
- Hunsaker, M. R. (2013). Neurocognitive endophenotypes in cgg ki and fmr1 ko mouse models of fragile x-associated disorders: an analysis of the state of the field. *F1000Research*, 2.
- Hunsaker, M. R. (2016). Applying the attribute model to develop behavioral tasks that phenocopy human clinical phenotypes using mouse disease models: an endophenotyping approach. In *The neurobiological basis of memory* (pp. 337–366). Springer.

- Hunsaker, M. R., Goodrich-Hunsaker, N. J., Willemsen, R., & Berman, R. F. (2010). Temporal ordering deficits in female cgg ki mice heterozygous for the fragile x premutation. *Behavioural brain research*, 213(2), 263–268.
- Hunsaker, M. R., Kim, K., Willemsen, R., & Berman, R. F. (2012). Cgg trinucleotide repeat length modulates neural plasticity and spatiotemporal processing in a mouse model of the fragile x premutation. *Hippocampus*, 22(12), 2260–2275.
- Hunsaker, M. R., von Leden, R. E., Ta, B. T., Goodrich-Hunsaker, N. J., Arque, G., Kim, K., . . . Berman, R. F. (2011). Motor deficits on a ladder rung task in male and female adolescent and adult cgg knock-in mice. *Behavioural brain research*, 222(1), 117–121.
- Hunsaker, M. R., Wenzel, H. J., Willemsen, R., & Berman, R. F. (2009). Progressive spatial processing deficits in a mouse model of the fragile x premutation. *Behavioral neuroscience*, 123(6), 1315.
- Kesner, R. P., Farnsworth, G., & DiMattia, B. V. (1989). Double dissociation of egocentric and allocentric space following medial prefrontal and parietal cortex lesions in the rat. *Behavioral neuroscience*, 103(5), 956.
- Kesner, R. P. & Goodrich-Hunsaker, N. J. (2010). Developing an animal model of human amnesia: the role of the hippocampus. *Neuropsychologia*, 48(8), 2290–2302.
- Kesner, R. P., Hui, X., Sommer, T., Wright, C., Barrera, V. R., & Fanselow, M. S. (2014). The role of postnatal neurogenesis in supporting remote memory and spatial metric processing. *Hippocampus*, 24(12), 1663–1671.
- Kesner, R. P., Lee, I., & Gilbert, P. (2004). A behavioral assessment of hippocampal function based on a subregional analysis. *Reviews in the Neurosciences*, 15(5), 333–352.
- Kesner, R. P. & Rolls, E. T. (2015). A computational theory of hippocampal function, and tests of the theory: new developments. *Neuroscience & Biobehavioral Reviews*, 48, 92–147.

- Kleschevnikov, A. M., Belichenko, P. V., Faizi, M., Jacobs, L. F., Htun, K., Shamloo, M., & Mobley, W. C. (2012). Deficits in cognition and synaptic plasticity in a mouse model of down syndrome ameliorated by gabab receptor antagonists. *The Journal of Neuroscience*, 32(27), 9217–9227.
- Kleschevnikov, A. M., Belichenko, P. V., Villar, A. J., Epstein, C. J., Malenka, R. C., & Mobley, W. C. (2004). Hippocampal long-term potentiation suppressed by increased inhibition in the ts65dn mouse, a genetic model of down syndrome. *The Journal of neuroscience*, 24(37), 8153–8160.
- Lanfranchi, S. [S], Carretti, B., Spano, G., & Cornoldi, C. (2009). A specific deficit in visuospatial simultaneous working memory in down syndrome. *Journal of Intellectual Disability Research*, 53(5), 474–483.
- Lanfranchi, S. [Silvia], Cornoldi, C., Vianello, R., & Conners, F. (2004). Verbal and visuospatial working memory deficits in children with down syndrome. *American Journal on Mental Retardation*, 109(6), 456–466.
- Lee, J. Y., Huerta, P. T., Zhang, J., Kowal, C., Bertini, E., Volpe, B. T., & Diamond, B. (2009). Neurotoxic autoantibodies mediate congenital cortical impairment of offspring in maternal lupus. *Nature medicine*, 15(1), 91–96.
- Lopez, L. L., Hauser, J., Feldon, J., Gargiulo, P., & Yee, B. (2010). Evaluating spatial memory function in mice: a within-subjects comparison between the water maze test and its adaptation to dry land. *Behavioural brain research*, 209(1), 85–92.
- Moore, S. J., Deshpande, K., Stinnett, G. S., Seasholtz, A. F., & Murphy, G. G. (2013). Conversion of short-term to long-term memory in the novel object recognition paradigm. *Neurobiology of learning and memory*, 105, 174–185.
- Pennington, B. F., Moon, J., Edgin, J., Stedron, J., & Nadel, L. (2003). The neuropsychology of down syndrome: evidence for hippocampal dysfunction. *Child development*, 74(1), 75–93.

- Ragozzino, M. E., Detrick, S., & Kesner, R. P. (1999). Involvement of the prelimbic–infralimbic areas of the rodent prefrontal cortex in behavioral flexibility for place and response learning. *The Journal of Neuroscience*, 19(11), 4585–4594.
- Ragozzino, M. E., Ragozzino, K. E., Mizumori, S. J., & Kesner, R. P. (2002). Role of the dorsomedial striatum in behavioral flexibility for response and visual cue discrimination learning. *Behavioral neuroscience*, 116(1), 105.
- Rast, M. M. & Harris, S. R. (1985). Motor control in infants with down syndrome. *Developmental Medicine & Child Neurology*, 27(5), 682–685.
- Reeves, R. H., Irving, N. G., Moran, T. H., Wohn, A., Kitt, C., Sisodia, S. S., ... Davisson, M. T. (1995). A mouse model for down syndrome exhibits learning and behaviour. *Nat. Genet*, 11, 177–184.
- Rolls, E. T. & Kesner, R. P. (2006). A computational theory of hippocampal function, and empirical tests of the theory. *Progress in neurobiology*, 79(1), 1–48.
- Sago, H., Carlson, E. J., Smith, D. J., Kilbridge, J., Rubin, E. M., Mobley, W. C., ... Huang, T.-T. (1998). Ts1cje, a partial trisomy 16 mouse model for down syndrome, exhibits learning and behavioral abnormalities. *Proceedings of the National Academy of Sciences*, 95(11), 6256–6261.
- Smith, G. K., Kesner, R. P., & Korenberg, J. R. (2014). Dentate gyrus mediates cognitive function in the ts65dn/dnj mouse model of down syndrome. *Hippocampus*, 24(3), 354–362.
- Stedron, J. M., Sahni, S. D., & Munakata, Y. (2005). Common mechanisms for working memory and attention: the case of perseveration with visible solutions. *Journal of cognitive neuroscience*, 17(4), 623–631.
- Team, R. C. (2014). R: a language and environment for statistical computing. vienna, austria: r foundation for statistical computing; 2013.
- Tennant, K. A., Asay, A. L., Allred, R. P., Ozburn, A. R., Kleim, J. A., & Jones, T. A. (2010). The vermicelli and capellini handling tests: simple quantitative measures of

- dexterous forepaw function in rats and mice. *JoVE (Journal of Visualized Experiments)*, (41), e2076–e2076.
- Vicari, S. (2006). Motor development and neuropsychological patterns in persons with down syndrome. *Behavior genetics*, 36(3), 355–364.
- Vicari, S., Bellucci, S., & Carlesimo, G. A. (2005). Visual and spatial long-term memory: differential pattern of impairments in williams and down syndromes. *Developmental Medicine & Child Neurology*, 47(05), 305–311.
- Virji-Babul, N., Kerns, K., Zhou, E., Kapur, A., & Shiffrar, M. (2006). Perceptual-motor deficits in children with down syndrome: implications for intervention. *Down Syndrome Research and Practice*, 10(2), 74–82.
- Visu-Petra, L., Benga, O., Miclea, M., et al. (2007). Visual-spatial processing in children and adolescents with down’s syndrome: a computerized assessment of memory skills. *Journal of Intellectual Disability Research*, 51(12), 942–952.
- Warburton, E. C., Baird, A., Morgan, A., Muir, J. L., & Aggleton, J. P. (2001). The conjoint importance of the hippocampus and anterior thalamic nuclei for allocentric spatial learning: evidence from a disconnection study in the rat. *The Journal of Neuroscience*, 21(18), 7323–7330.
- Warburton, E., Baird, A. L., Morgan, A., Muir, J. L., & Aggleton, J. P. (2000). Disconnecting hippocampal projections to the anterior thalamus produces deficits on tests of spatial memory in rats. *European Journal of Neuroscience*, 12(5), 1714–1726.
- Zampieri, B. L., Fernandez, F., Pearson, J. N., Stasko, M. R., & Costa, A. C. (2014). Ultrasonic vocalizations during male–female interaction in the mouse model of down syndrome ts65dn. *Physiology & behavior*, 128, 119–125.

Table 1

*Comparison of Arizona Cognitive Task Battery (ACTB) and Mouse Variant Reported in this Manuscript (mACTB)*

| Domain/Test in ACTB                                                      | Abilities Assessed                              | Analogous Task in mACTB                                       |
|--------------------------------------------------------------------------|-------------------------------------------------|---------------------------------------------------------------|
| <b><i>Benchmark, General Cognitive Ability</i></b>                       |                                                 |                                                               |
| KBIT-II Verbal Subscale                                                  | Receptive and Productive Language               | <i>not modeled</i>                                            |
| KBIT-II Nonverbal Subscale                                               | Problem Solving                                 | <i>not modeled</i>                                            |
| Scales of Independent Behavior-Revised (SIB-R)                           | Adaptive Function                               | Nesting, Neophobia                                            |
| CANTAB Spatial Span                                                      | Immediate Memory for Spatiotemporal Information | Temporal Order for Visual Objects                             |
| <b><i>Prefrontal Cortex - Executive Function, Response Attribute</i></b> |                                                 |                                                               |
| Modified Dots Task                                                       | Inhibitory Control and Working Memory           | Spontaneous Alternation                                       |
| CANTAB IED                                                               | Set Shifting                                    | Rule Response Learning, Rule Reversal Learning                |
| <b><i>Medial Temporal Lobe - Spatial Attribute</i></b>                   |                                                 |                                                               |
| CANTAB PALS                                                              | Spatial Associative Memory                      | Location Recognition                                          |
| Virtual Water Maze                                                       | Spatial Memory/Navigation                       | Dry Land Water Maze (Cheeseboard)                             |
| <i>not evaluated</i>                                                     | Spatial Relationships                           | Coordinate, Categorical                                       |
| <b><i>Medial Temporal Lobe - Temporal Attribute</i></b>                  |                                                 |                                                               |
| <i>not evaluated</i>                                                     | Temporal Processing/Sequence Learning           | Temporal Ordering for Visual Objects                          |
| <b><i>Medial Temporal Lobe - Sensory/Perceptual Attribute</i></b>        |                                                 |                                                               |
| <i>not evaluated</i>                                                     | Object Recognition                              | Feature Ambiguity, Object Recognition, Novel Object Detection |
| <b><i>Cerebellum - Motor Function</i></b>                                |                                                 |                                                               |
| Finger Sequencing Task                                                   | Motor Sequencing                                | Capellini Handling                                            |
| NEPSY Visuomotor Precision                                               | Visuomotor Tracking/Hand-Eye Coordination       | Parallel Rung Walk, Capellini Handling                        |
| CANTAB SRT                                                               | Motor Response Time/Attention                   | <i>not modeled</i>                                            |

*The mACTB was designed to model as many of the functions as the ACTB was designed to tests in humans. Although the mACTB is incomplete due to difficulties in modeling human cognitive function in murine models, the majority of attributes studies by the ACTB are recapitulated in the mACTB and Ts65DN mice modeling Down Syndrome show a similar pattern of deficits on the mACTB as humans with Down Syndrome show in the ACTB (Edgin et al., 2010, 2012)*

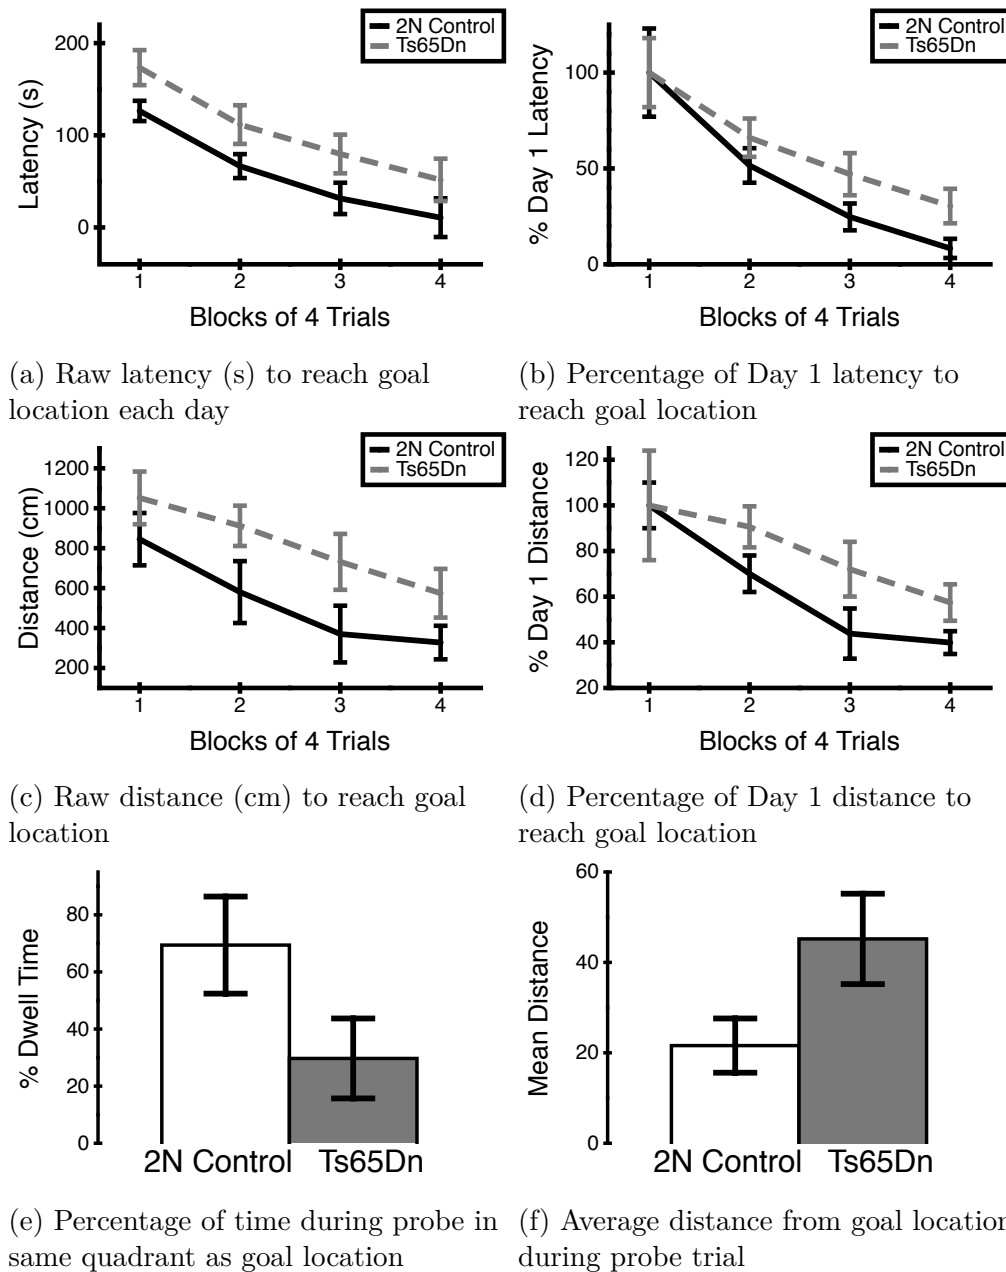

Figure 1. Dry land water maze performance on a cheeseboard for Ts65Dn and 2N wildtype control mice. Ts65Dn mice showed impaired spatial navigation abilities during the 4 days of acquisition, even when adjusted for initial performance. Ts65Dn mice also show spatial memory deficits during the probe trial relative to 2N wildtype control mice, reflected in reduced time in the quadrant containing the reward location and greater average distance from the previously rewarded location compared to 2N control mice.

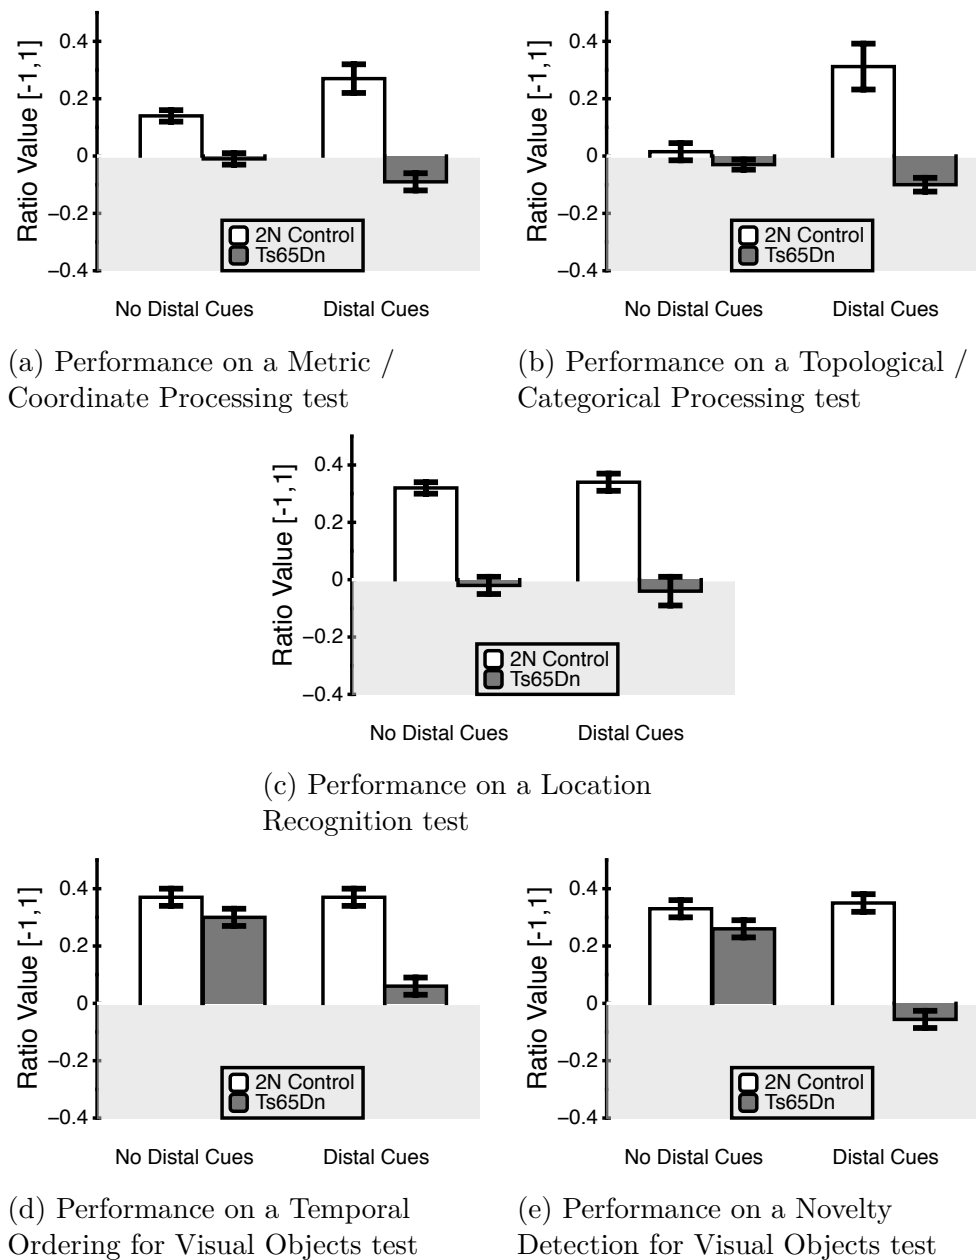

Figure 2. Spatial and Temporal Attribute task battery. The data suggest Ts65Dn mice show deficits relative to 2N wildtype control mice for location recognition and metric/coordinate processing, but no deficits for topological/categorical processing. The Ts65Dn mice do not show deficits for temporal ordering for visual objects compared to 2N wildtype control mice.

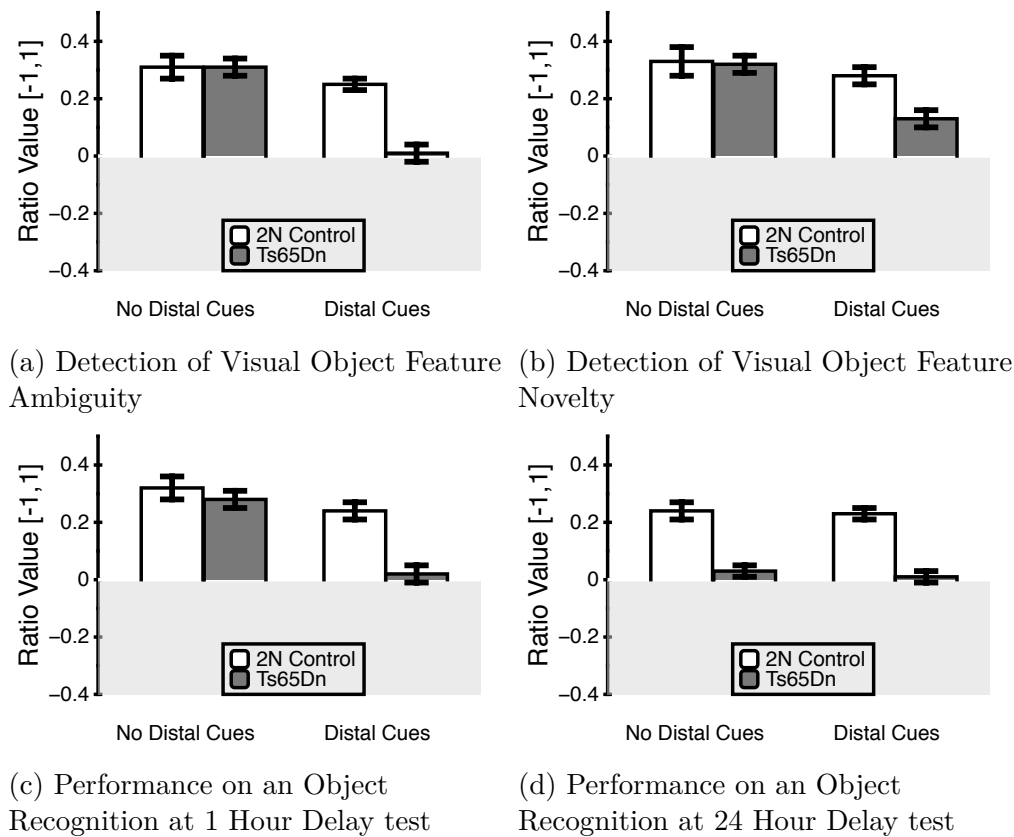

Figure 3. Sensory/Perceptual Attribute task battery. Overall, Ts65Dn mice do not show impaired sensory/perceptual function relative to 2N wildtype mice. Ts65Dn mice also do not show deficits for object recognition at a 1 hour delay, but do show deficits for object recognition at 24 hour delays.

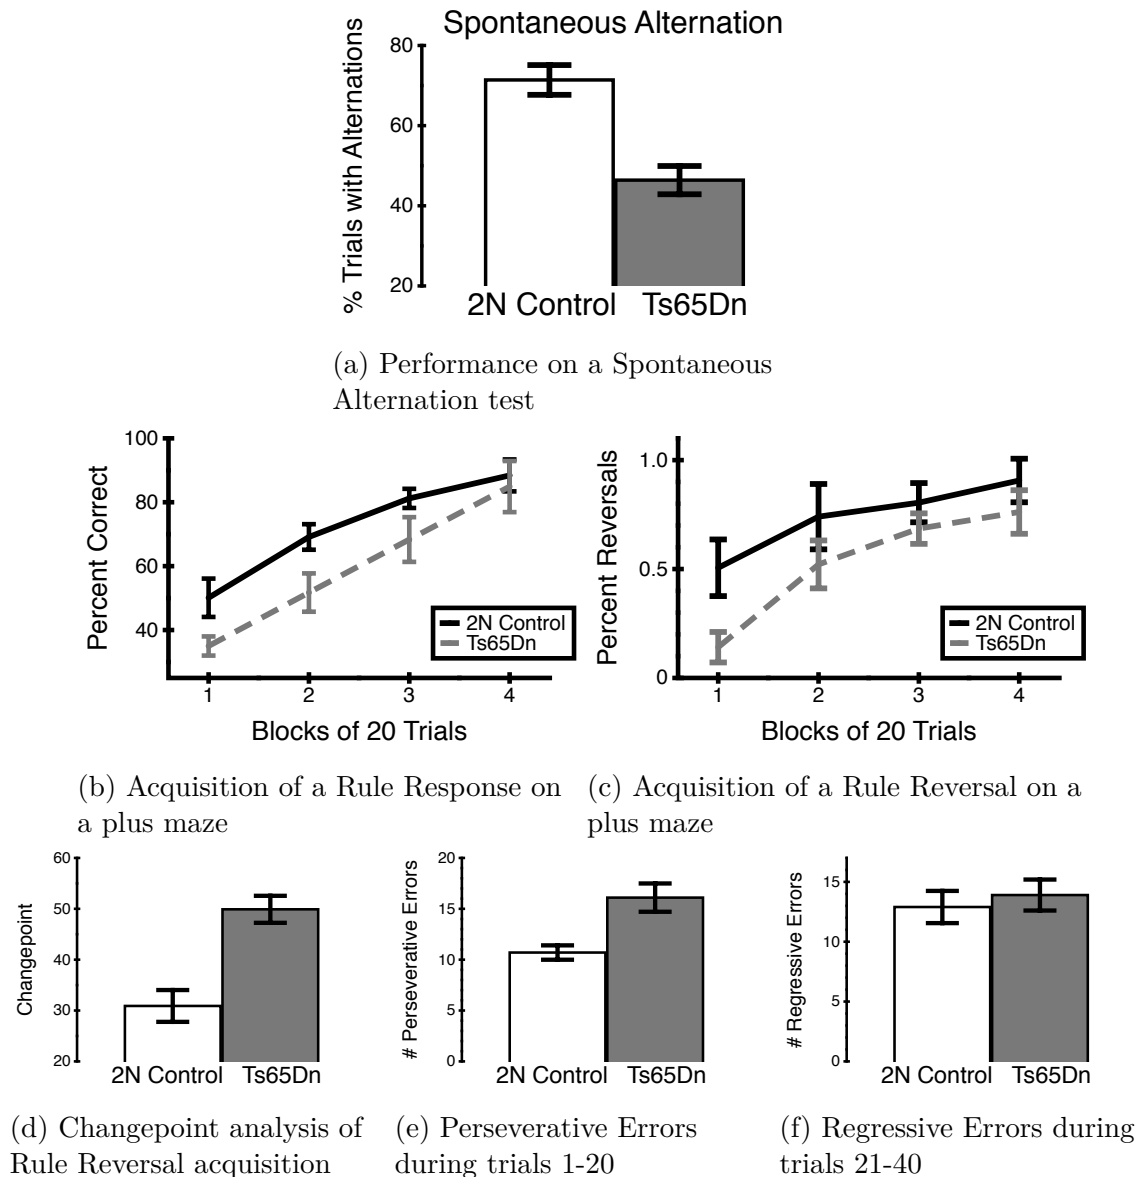

*Figure 4. Executive Function / Rule Based Memory Task Battery. Ts65Dn mice show fewer alternations on a spontaneous alternation task relative to 2N control mice. Ts65Dn mice show mild deficits for acquisition and reversal of a rule based response on a plus maze. During reversal training, Ts65Dn mice learn to apply the new rule on later trials than control mice, reflected by an increased number of perseverative, but not regressive, errors.*

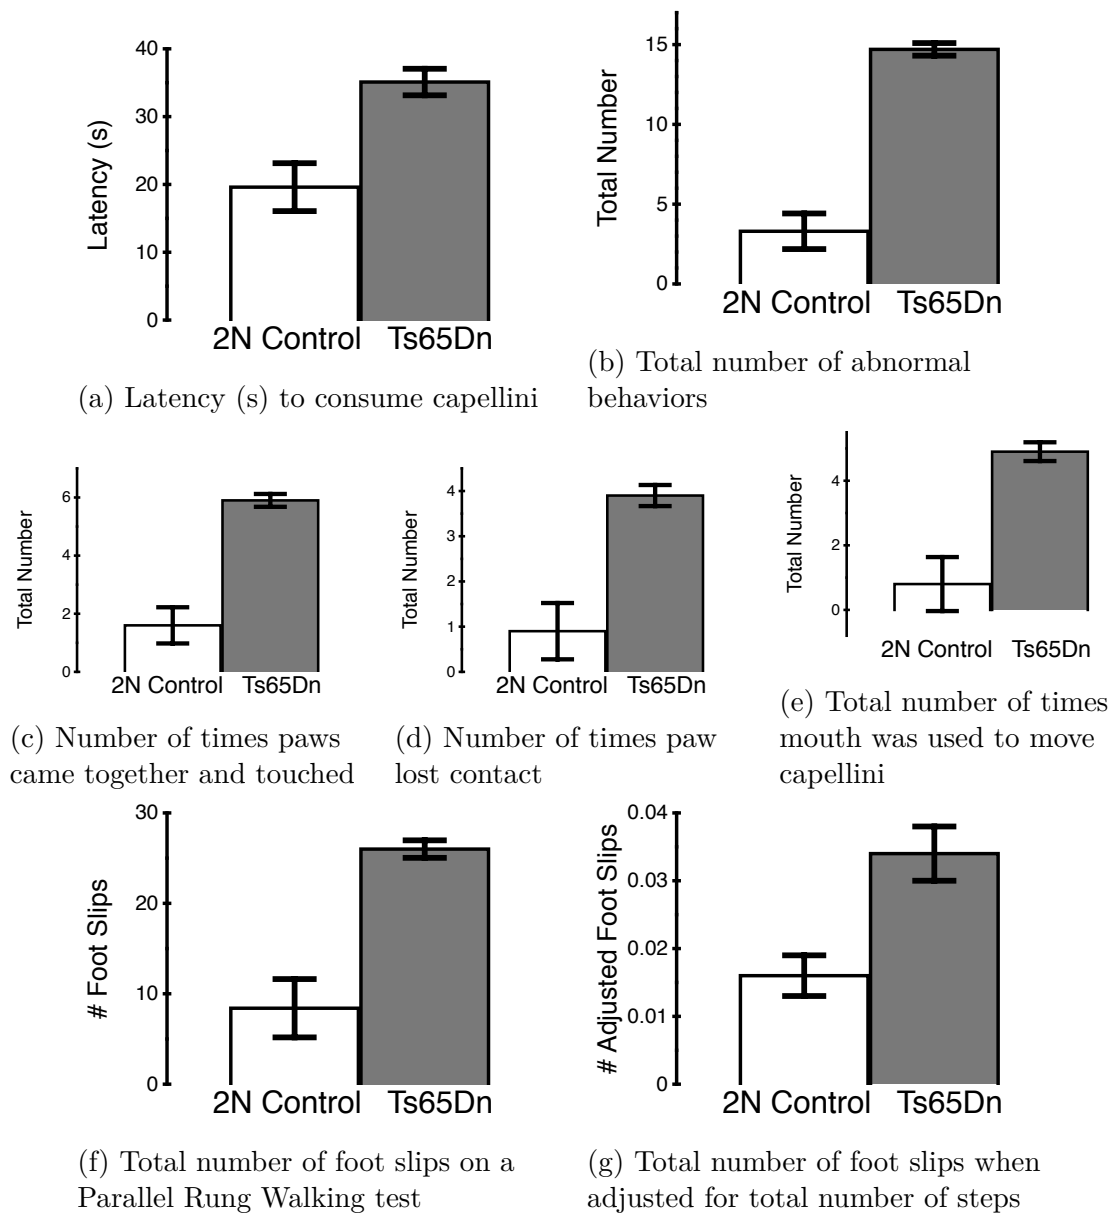

*Figure 5. Motor Function Task Battery. Ts65DN mice showed reduced motor dexterity during a Capellini Handling task reflected as an increase in the number of abnormal behaviors and increased latency to consume the capellini as well a greater number of foot slips during a Parallel Rung Walking task, even when adjusted for total number of steps.*

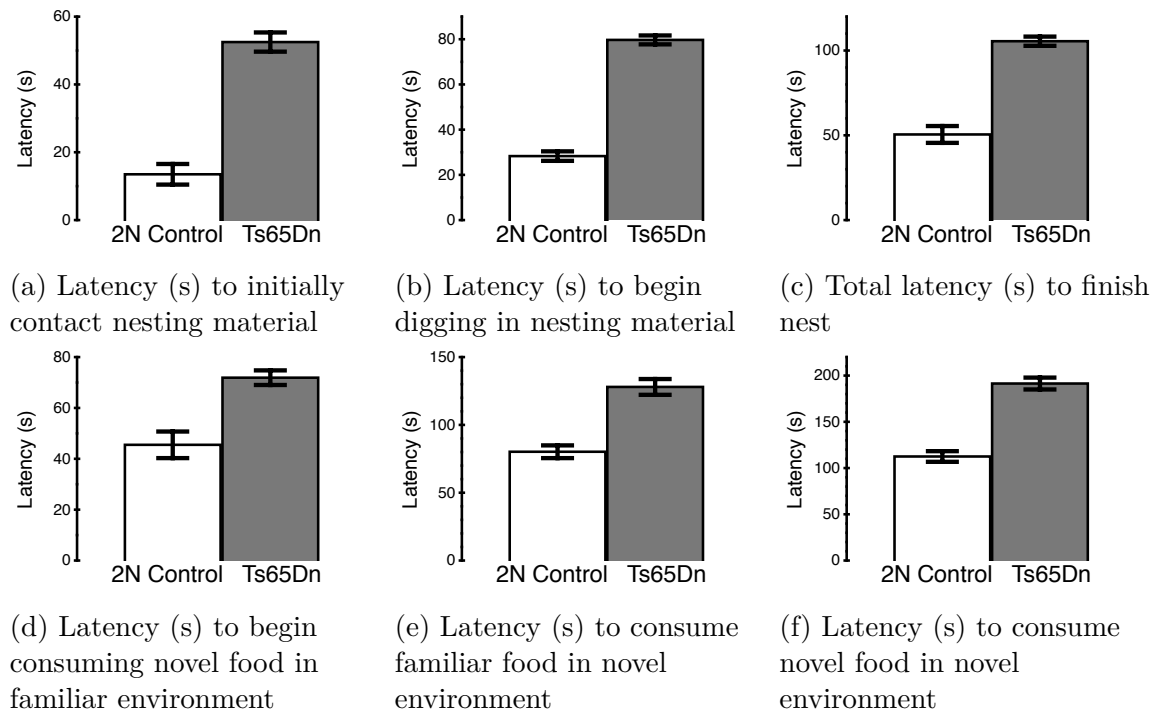

Figure 6. Adaptive Function / Quality of Life Task Battery. *Ts65Dn* mice take longer to make a nest out of preferred nesting material and show increased neophobia for both food and environments.
